# Supplementary material
Source: MDPI journal article supplement (https://www.mdpi.com/2227-9717/11/5/1308)
Supplement: s1 [file s1]

## Enhanced Adsorption Ability of Agro-waste Biomaterial by Deep Eutectic Solvent

Jelena Dimitrijević <sup>1\*</sup>, Sanja Jevtić <sup>2</sup>, Aleksandar Marinković<sup>2</sup>, Marija Simić<sup>1</sup>, Marija Koprivica<sup>1</sup> and Jelena Petrović<sup>1</sup>

<sup>1</sup> Institute for Technology of Nuclear and Other Mineral Raw Materials, 86 Franchet d'Esperey St., 11000 Belgrade, Serbia

<sup>2</sup> Faculty of Technology and Metallurgy, University of Belgrade, Karnegijeva 4, 11000 Belgrade, Serbia

\* Correspondence: j.dimitrijevic@itnms.ac.rs Tel/Fax: +381 11 3691 722

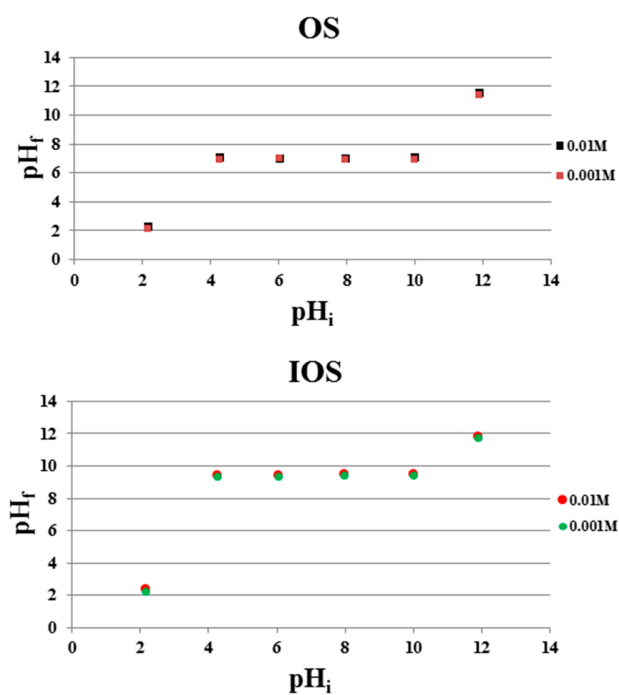

Figure S1. pH<sub>Hz</sub> of OS and IOS.
